# Supplementary material
Source: MDPI journal article supplement (https://www.mdpi.com/2073-4441/14/4/629)
Supplement: s1 [file s1 › water-1571448-supplementary.pdf]

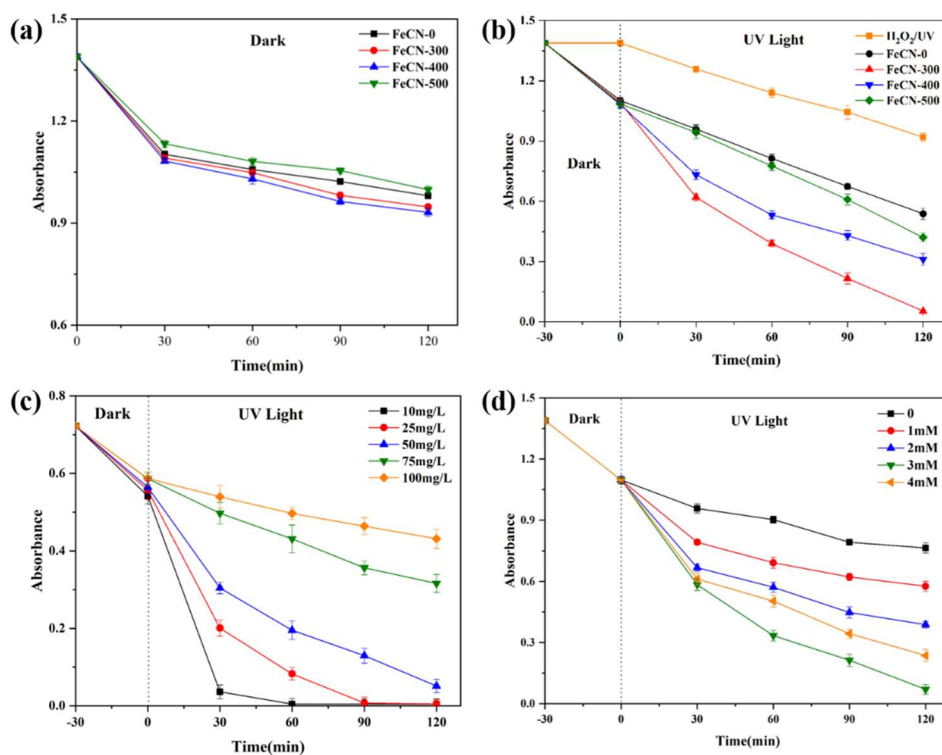

**Figure S1.** (a) Adsorption of MO under four different catalytic conditions ( $[\text{Catalyst}] = 0.2 \text{ g/L}$ ,  $[\text{MO}] = 50 \text{ mg/L}$ ). (b) Degradation of methyl orange under four different catalytic conditions and  $\text{H}_2\text{O}_2/\text{UV}$  condition ( $[\text{Catalyst}] = 0.2 \text{ g/L}$ ,  $[\text{MO}] = 50 \text{ mg/L}$ ,  $[\text{H}_2\text{O}_2] = 3 \text{ mM}$ ). (c) Effect of methyl orange concentration ( $[\text{FeCN-300}] = 0.2 \text{ g/L}$ ,  $[\text{H}_2\text{O}_2] = 3 \text{ mM}$ ). (d) Effect of  $\text{H}_2\text{O}_2$  concentration ( $[\text{FeCN-300}] = 0.2 \text{ g/L}$ ,  $[\text{MO}] = 50 \text{ mg/L}$ ).
